# Supplementary material
Source: MDPI journal article supplement (https://www.mdpi.com/2073-4344/7/4/110)
Supplement: s1 [file s1]

Supplementary Materials: Study of the V2O5-WO3/TiO2 Catalyst Synthesized from Waste Catalyst on Selective Catalytic Reduction of NO*x* by NH3

Chunping Qi, Weijun Bao, Liguo Wang, Huiquan Li and Wenfen Wu





**Figure S1.** NO conversion of the fresh, waste catalyst, and waste catalyst loaded with 0.2% V2O5. (Feed: NO = 1000 ppm, NH3/NO = 1.0, O2 = 5 vol %. Conditions: total flow rate = 1600 mL/min, GHSV = 27,430 h−1).
